# Supplementary material for: CT-based radiomics signature of visceral adipose tissue for prediction of disease progression in patients with Crohn's disease: A multicentre cohort study
Source: PubMed Central journal article supplement — eClinicalMedicine. 2022 Dec 30;56:101805. doi: 10.1016/j.eclinm.2022.101805 (PMC9816914; doi:10.1016/j.eclinm.2022.101805), 2022-12-30
Supplement: mmc3.pdf [file mmc3.pdf]

The following translations in Chinese were submitted by the authors and we reproduce them as supplied. They have not been peer reviewed. Our editorial processes have only been applied to the original abstract in English, which should serve as reference for this manuscript.

## 摘要

**背景:** 内脏脂肪组织 (VAT) 与克罗恩病 (CD) 的发病机理有关, 但其对 CD 疾病进展的影响尚缺乏研究。本研究使用计算机断层扫描 (CT) 图像开发并验证了一种 VAT-放射组学模型 (RM) 来预测 CD 患者的疾病进展, 并与皮下脂肪组织 (SAT) -RM 进行比较。

**方法:** 回顾性分析 2015 年 6 月 19 日至 2020 年 6 月 14 日来自中国 3 家三级甲等医院有完整 CT 资料的 256 例 (训练组 156 例; 验证组 100 例) CD 患者。3 家医院分别为中山大学附属第一医院, 汕头大学附属第一医院和佛山市第一人民医院。疾病进展是指在随访期间发生穿透性疾病、狭窄性疾病或 CD 相关手术。从训练组患者的 CT 图像中提取 1130 个放射组学特征, 使用 LASSO 回归算法进行特征筛选, 开发了一种可以预测疾病进展的机器学习模型 VAT-RM, 并在外部验证组中进行验证。使用相同的建模方法, 开发了 SAT-RM, 并与 VAT-RM 的结果进行比较。

**结果:** 在总验证组 (ROC 曲线下面积[AUC]=0.850, 95%置信区间[CI] 0.764-0.913,  $P < 0.001$ )、验证组 1 (AUC=0.820, 95%CI 0.687-0.914,  $P < 0.001$ ) 和 2 (AUC=0.871, 95%CI 0.744-0.949,  $P < 0.001$ ) 中, VAT-RM 对疾病进展的预测表现令人满意。AUC 在验证组 1 和 2 之间无显著差异( $P=0.673$ ), 说明 VAT-RM 具有相当好的效能和稳定性。在总验证组中, VAT-RM 预测疾病进展的 AUC 高于 SAT-RM (AUC= 0.786, 95%CI 0.692 - 0.861,  $P < 0.001$ )。在多因素 Cox 回归分析中, VAT-RM (风险比[HR]=9.285,  $P=0.005$ ) 是最重要的独立预测因子, 其次是 SAT-RM (HR=3.280,  $P=0.060$ )。决策曲线分析进一步证实了 VAT-RM 的净效能优于 SAT-RM。此外, 将 SAT-RM 加入 VAT-RM 后, 未能显著提高预测效果 (综合判别改善指数=0.031,  $P=0.102$ )。

**结论:** VAT 是 CD 患者疾病进展的一个重要决定因素。基于 CT 建立的 VAT-RM 对 CD 患者疾病进展有较好的预测价值, 其效能优于 SAT-RM。
